# Table of Contents

## FEATURES

### *Approaches to Biology Teaching and Learning*

- On Hiring Science Faculty with Education Specialties for Your Science (Not Education) Department**  
S. D. Bush, N. J. Pelaez, J. A. Rudd, M. T. Stevens, K. S. Williams, D. E. Allen, and K. D. Tanner .....297–305

### *Video Views and Reviews*

- The Bacterial Cytoskeleton**  
Christopher Watters .....306–310

### *Book Review*

- Walking the Walk**  
Robin L. Wright .....311–312

## LETTERS TO THE EDITOR

- Re: The Use of a Knowledge Survey as an Indicator of Student Learning in an Introductory Biology Course**  
Edward B. Nuhfer and Delores Knipp .....313–314

- RESPONSE: Re: The Use of a Knowledge Survey as an Indicator of Student Learning in an Introductory Biology Course**  
Nancy Bowers and Maureen Brandon .....315

- RESPONSE: Re: The Use of a Knowledge Survey as an Indicator of Student Learning in an Introductory Biology Course**  
Diane Ebert-May and Everett P. Weber .....315–316

- How Teaching Matters**  
Samuel C. Silverstein .....316–317

## ESSAY

- A Simple E-Mail Mechanism To Enhance Reflection, Independence, and Communication in Young Researchers**  
A. Malcolm Campbell and Barbara Lom .....318–322

## ARTICLES

- Assessing Students' Ability to Trace Matter in Dynamic Systems in Cell Biology**  
Christopher D. Wilson, Charles W. Anderson, Merle Heidemann, John E. Merrill, Brett W. Merritt,  
Gail Richmond, Duncan F. Sibley, and Joyce M. Parker .....323–331

- DNA Microarray Wet Lab Simulation Brings Genomics into the High School Curriculum**  
A. Malcolm Campbell, Carolyn A. Zanta, Laurie J. Heyer, Ben Kittinger, Kathleen M. Gabric, and  
Leslie Adler .....332–339

- An Intensive Primary-Literature-based Teaching Program Directly Benefits Undergraduate Science Majors and Facilitates Their Transition to Doctoral Programs**  
Carol A. Kozeracki, Michael F. Carey, John Colicelli, and Marc Levis-Fitzgerald .....340–347

- A Simple Classroom Teaching Technique To Help Students Understand Michaelis-Menten Kinetics**  
Steven W. Runge, Brent J.F. Hill, and William M. Moran .....348–352

- Enhancing Undergraduate Teaching and Research with a *Drosophila* Virginizing System**  
Dennis R. Venema .....353–360

### *On the Cover*

FtsZ, a bacterial protein homologous to tubulin, forms a constricting ring-shaped structure during cell division at the location where a septum will form and divide the two daughter cells. The images on the cover, obtained with an atomic force microscope (AFM), illustrate the dynamic behavior of FtsZ filaments *in vitro*. The filaments are seen initially (A), after 10 min (B), and after 26 min (C) of being resuspended in a thin film of medium containing 1 mM GTP. Asterisks designate the same ring in B and C. Additional images were captured every 2 min (about the time required to scan the preparation) to create a short movie, which may be viewed at <http://www.jbc.org/content/vol10/issue2005/images/data/M503059200/DC1/FtsZPolymersMV.AVI>.

The AFM creates images not by focusing a beam of radiation like optical and electron microscopes, but by scanning with a fine probe that records the contours of a surface at molecular resolution, as described in the Video Views and Reviews feature on page 306. Contrast indicates the height of an object above the substrate; color is added artificially.

*A goal of CBE—Life Sciences Education is to stimulate dialogue; therefore, readers are invited to submit comments on these articles to [cbe@ascb.org](mailto:cbe@ascb.org).*
